# Supplementary material for: Therapeutic Liquid Formulations Based on Low Transition Temperature Mixtures for the Incorporation of Anti-Inflammatory Drugs
Source: MDPI journal article supplement (doi:10.3390/pharmaceutics13101620), 2021-10-05
Supplement: s1 [file s1]

# Supplementary Materials: Therapeutic Liquid Formulations Based on Low Transition Temperature Mixtures for the Incorporation of Anti-Inflammatory Drugs

Ana Roda and Alexandre Paiva Nand Ana Rita C. Duarte \*

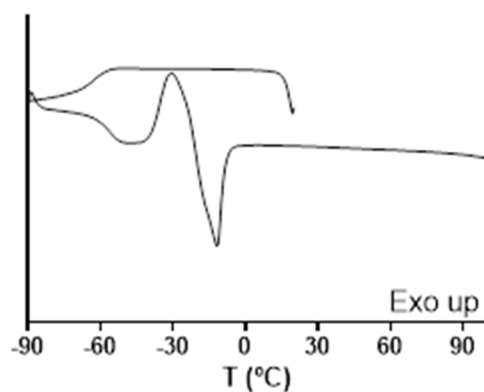

**Figure S1.** DSC thermogram of C:A:W 1:1:7 (molar ratio). Data from Roda et al. (ref. [29] in main article).

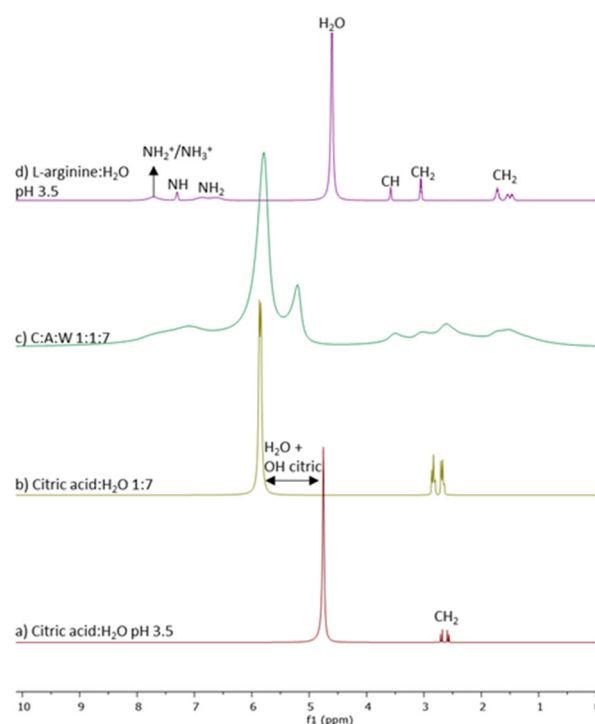

**Figure S2.** “<sup>1</sup>H NMR spectra of a) citric acid:H<sub>2</sub>O pH=3.5; b) citric acid:H<sub>2</sub>O 1:7; c) citric acid:L-arginine:H<sub>2</sub>O 1:1:7”; d) L-arginine:H<sub>2</sub>O pH=3.5. Figure adapted from data published in Roda et al. (ref. [29] in main article); consult the cited manuscript for detailed discussion.

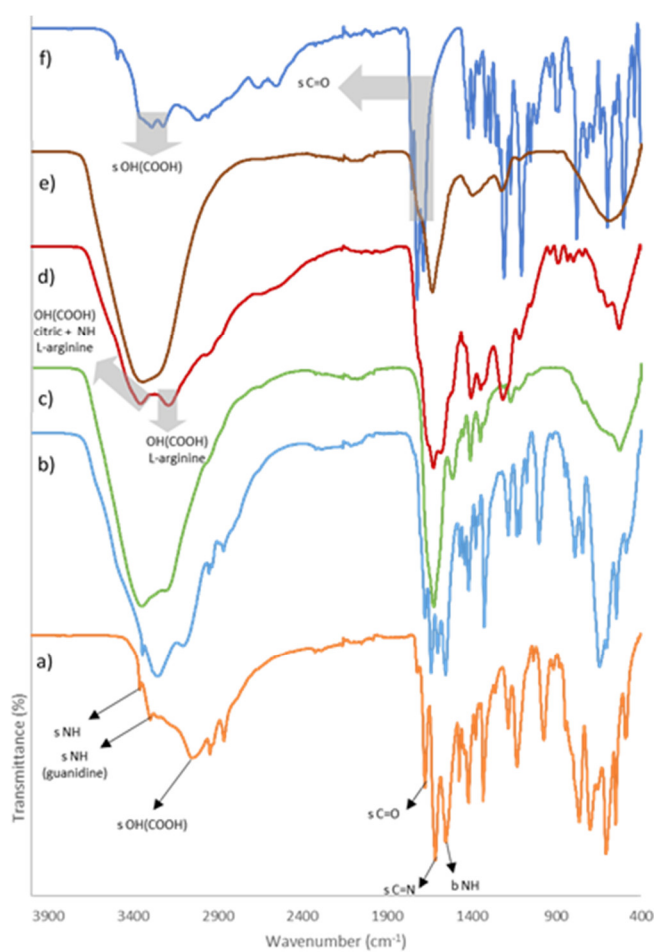

**Figure S3.** “FTIR spectra of a) pure L-arginine (orange line); b) L-arginine:H<sub>2</sub>O 1:7 mol (light blue line); c) L-arginine:H<sub>2</sub>O pH=3.5 (green line); d) citric acid:L-arginine: H<sub>2</sub>O 1:1:7 mol (red line);” e) citric acid: H<sub>2</sub>O pH 3.5 (brown line); “f) pure citric acid (dark blue line). “s” and “b” refer to stretching and bending vibrations, respectively.” Figure adapted from data published in Roda et al. (ref. [29] in main article). Consult the cited manuscript for detailed discussion.
